# Supplementary material for: Stepwise membrane fouling model for shear-enhanced filtration of alfalfa juice: experimental and modeling studies
Source: Royal Society of Chemistry journal article supplement (doi:10.1039/c6ra23212d), 2016-01-01
Supplement: c6ra23212d1.pdf [file c6ra23212d1.pdf]

## Supplementary material

### Stepwise membrane fouling model for shear-enhanced filtration of alfalfa juice: experimental and modeling studies

Wenxiang Zhang<sup>a,b\*</sup>, Luhui Ding<sup>b</sup>, Michel Y. Jaffrin<sup>c</sup>, Nabil Grimi<sup>b</sup>, Bing Tang<sup>a</sup>

<sup>a</sup>*School of Environmental Science and Engineering, Guangdong University of Technology, Guangzhou 510006, PR China*

<sup>b</sup>*EA 4297 TIMR, University of Technology of Compiègne, 60205 Compiègne Cedex, France*

<sup>c</sup>*UMR 7338, Technological University of Compiègne, 60205 Compiègne Cedex, France*

\*Corresponding authors: Wenxiang Zhang E-mail addresses: zhangwenxiang1987@qq.com (W. Zhang)

Tel: +33 3 4423 4634, Fax: +33 6 6361 4378

Table S1 Parameters of SMDM for fouling process of MF

|                  | Step   | $\beta$ (m <sup>-1</sup> )                   | $\gamma$                               | $R^2$             | $TMP_i$ (bar) |
|------------------|--------|----------------------------------------------|----------------------------------------|-------------------|---------------|
| <b>MF (VRR1)</b> |        |                                              |                                        |                   |               |
| 2500 rpm         | Step 1 | $\beta_1 = 4.38E+08$                         | $\gamma_1 = 0.54$                      | 0.996             |               |
| 2000 rpm         | Step 1 | $\beta_1 = 7.40E+08$                         | $\gamma_1 = 0.52$                      | 0.996             |               |
| 1500 rpm         | Step 1 | $\beta_1 = 1.34E+09$                         | $\gamma_1 = 0.48$                      | 0.991             |               |
|                  | Step 2 | $\beta_1 = 1.04E+10$<br>$\beta_2 = 2.07E+10$ | $\gamma_1 = 0.56$<br>$\gamma_2 = 0.53$ | 0.995             | 1.50          |
| 1000 rpm         | Step 1 | $\beta_1 = 1.88E+09$                         | $\gamma_1 = 0.46$                      | 0.995             |               |
|                  | Step 2 | $\beta_1 = 3.63E+10$<br>$\beta_2 = 2.08E+10$ | $\gamma_1 = 0.48$<br>$\gamma_2 = 0.48$ | 0.989             | 1.00          |
| 500 rpm          | Step 1 | $\beta_1 = 3.22E+09$                         | $\gamma_1 = 0.42$                      | 0.996             |               |
|                  | Step 2 | $\beta_1 = 4.67E+10$<br>$\beta_2 = 3.73E+10$ | $\gamma_1 = 0.44$<br>$\gamma_2 = 0.45$ | 0.996             | 1.00          |
|                  |        | Step 3                                       | $\beta_1 = 6.98E+11$                   | $\gamma_1 = 0.60$ | 0.993         |
| <b>MF (VRR3)</b> |        |                                              |                                        |                   |               |
| 2500 rpm         | Step 1 | $\beta_1 = 4.79E+08$                         | $\gamma_1 = 0.43$                      | 0.994             |               |
|                  | Step 2 | $\beta_1 = 4.20E+09$<br>$\beta_2 = 1.80E+10$ | $\gamma_1 = 0.45$<br>$\gamma_2 = 0.46$ | 0.998             | 1.50          |
| 2000 rpm         | Step 1 | $\beta_1 = 7.64E+08$                         | $\gamma_1 = 0.40$                      | 0.993             |               |
|                  | Step 2 | $\beta_1 = 4.26E+09$<br>$\beta_2 = 2.67E+10$ | $\gamma_1 = 0.43$<br>$\gamma_2 = 0.44$ | 0.992             | 1.25          |
| 1500 rpm         | Step 1 | $\beta_1 = 1.18E+09$                         | $\gamma_1 = 0.38$                      | 0.993             |               |
|                  | Step 2 | $\beta_1 = 6.66E+10$<br>$\beta_2 = 1.82E+10$ | $\gamma_1 = 0.41$<br>$\gamma_2 = 0.41$ | 0.993             | 1.00          |
|                  |        | Step 3                                       | $\beta_1 = 4.72E+11$                   | $\gamma_1 = 0.55$ | 0.994         |

|           |        |                            |                  |       |      |
|-----------|--------|----------------------------|------------------|-------|------|
| 1000 rpm  | Step 1 | $\beta_1= 1.89\text{E}+09$ | $\gamma_1= 0.36$ | 0.991 |      |
|           | Step 2 | $\beta_1= 1.62\text{E}+11$ | $\gamma_1= 0.39$ | 0.993 | 0.75 |
|           |        | $\beta_2= 8.44\text{E}+10$ | $\gamma_2= 0.40$ |       |      |
|           | Step 3 | $\beta_1= 5.07\text{E}+12$ | $\gamma_1= 0.53$ | 0.998 | 2.50 |
| 500 rpm   | Step 1 | $\beta_1= 3.37\text{E}+09$ | $\gamma_1= 0.33$ | 0.991 |      |
|           | Step 2 | $\beta_1= 2.17\text{E}+11$ | $\gamma_1= 0.40$ | 0.992 | 0.75 |
|           |        | $\beta_2= 9.08\text{E}+10$ | $\gamma_2= 0.35$ |       |      |
|           | Step 3 | $\beta_1= 7.90\text{E}+11$ | $\gamma_1= 0.50$ | 0.995 | 2.50 |
| MF (VRR6) |        |                            |                  |       |      |
| 2500 rpm  | Step 1 | $\beta_1= 5.68\text{E}+08$ | $\gamma_1= 0.35$ | 0.994 |      |
|           | Step 2 | $\beta_1= 4.59\text{E}+09$ | $\gamma_1= 0.39$ | 0.994 | 1.50 |
|           |        | $\beta_2= 3.60\text{E}+10$ | $\gamma_2= 0.40$ |       |      |
|           | Step 3 | $\beta_1= 5.07\text{E}+11$ | $\gamma_1= 0.52$ | 0.994 | 2.50 |
| 2000 rpm  | Step 1 | $\beta_1= 8.58\text{E}+08$ | $\gamma_1= 0.32$ | 0.992 |      |
|           | Step 2 | $\beta_1= 3.90\text{E}+10$ | $\gamma_1= 0.40$ | 1.000 | 1.25 |
|           |        | $\beta_2= 1.57\text{E}+10$ | $\gamma_2= 0.36$ |       |      |
|           | Step 3 | $\beta_1= 1.33\text{E}+12$ | $\gamma_1= 0.51$ | 0.991 | 2.50 |
| 1500 rpm  | Step 1 | $\beta_1= 1.26\text{E}+09$ | $\gamma_1= 0.30$ | 0.993 |      |
|           | Step 2 | $\beta_1= 4.08\text{E}+10$ | $\gamma_1= 0.38$ | 0.998 | 1.00 |
|           |        | $\beta_2= 5.54\text{E}+10$ | $\gamma_2= 0.35$ |       |      |
|           | Step 3 | $\beta_1= 5.22\text{E}+12$ | $\gamma_1= 0.49$ | 0.991 | 2.50 |
| 1000 rpm  | Step 1 | $\beta_1= 2.10\text{E}+09$ | $\gamma_1= 0.29$ | 0.995 |      |
|           | Step 2 | $\beta_1= 4.88\text{E}+11$ | $\gamma_1= 0.36$ | 0.997 | 0.75 |
|           |        | $\beta_2= 1.16\text{E}+10$ | $\gamma_2= 0.34$ |       |      |
|           | Step 3 | $\beta_1= 6.35\text{E}+11$ | $\gamma_1= 0.45$ | 0.994 | 2.25 |
|           |        | $\beta_2= 7.03\text{E}+12$ | $\gamma_2= 0.46$ |       |      |
| 500 rpm   | Step 1 | $\beta_1= 3.41\text{E}+09$ | $\gamma_1= 0.27$ | 0.998 |      |
|           | Step 2 | $\beta_1= 1.07\text{E}+12$ | $\gamma_1= 0.35$ | 0.992 | 0.75 |
|           |        | $\beta_2= 3.40\text{E}+11$ | $\gamma_2= 0.31$ |       |      |
|           | Step 3 | $\beta_1= 3.47\text{E}+11$ | $\gamma_1= 0.41$ | 0.998 | 2.25 |
|           |        | $\beta_2= 9.50\text{E}+12$ | $\gamma_2= 0.43$ |       |      |

Table S2 Parameters of SMDM for fouling process of UF

|           | Step   | $\beta$ ( $\text{m}^{-1}$ ) | $\gamma$         | $R^2$ | $TMP_i$ (bar) |
|-----------|--------|-----------------------------|------------------|-------|---------------|
| UF (VRR1) |        |                             |                  |       |               |
| 2500 rpm  | Step 1 | $\beta_1= 5.87\text{E}+09$  | $\gamma_1= 0.28$ | 0.998 |               |
| 2000 rpm  | Step 1 | $\beta_1= 6.52\text{E}+09$  | $\gamma_1= 0.22$ | 0.996 |               |
|           | Step 2 | $\beta_1= 4.62\text{E}+10$  | $\gamma_1= 0.22$ | 0.993 | 4.50          |
|           |        | $\beta_2= 5.58\text{E}+10$  | $\gamma_2= 0.24$ |       |               |

|           |        |                     |                  |       |      |
|-----------|--------|---------------------|------------------|-------|------|
| 1500 rpm  | Step 1 | $\beta_1= 6.98E+09$ | $\gamma_1= 0.20$ | 0.998 |      |
|           | Step 2 | $\beta_1= 5.50E+10$ | $\gamma_1= 0.21$ | 0.998 | 4.00 |
|           |        | $\beta_2= 2.12E+11$ | $\gamma_2= 0.23$ |       |      |
| 1000 rpm  | Step 1 | $\beta_1= 8.56E+09$ | $\gamma_1= 0.16$ | 1.000 |      |
|           | Step 2 | $\beta_1= 6.28E+10$ | $\gamma_1= 0.21$ | 0.986 | 3.00 |
|           |        | $\beta_2= 2.33E+11$ | $\gamma_2= 0.20$ |       |      |
|           | Step 3 | $\beta_1= 7.80E+11$ | $\gamma_1= 0.28$ | 0.985 | 5.00 |
| 500 rpm   | Step 1 | $\beta_1= 9.89E+09$ | $\gamma_1= 0.14$ | 1.000 |      |
|           | Step 2 | $\beta_1= 4.06E+11$ | $\gamma_1= 0.20$ | 0.990 | 3.00 |
|           |        | $\beta_2= 1.22E+11$ | $\gamma_2= 0.18$ |       |      |
|           | Step 3 | $\beta_1= 2.60E+12$ | $\gamma_1= 0.26$ | 0.993 | 4.50 |
| UF (VRR3) |        |                     |                  |       |      |
| 2500 rpm  | Step 1 | $\beta_1= 6.13E+09$ | $\gamma_1= 0.18$ | 1.000 |      |
| 2000 rpm  | Step 1 | $\beta_1= 6.80E+09$ | $\gamma_1= 0.16$ | 1.000 |      |
|           | Step 2 | $\beta_1= 1.52E+11$ | $\gamma_1= 0.17$ | 0.984 | 4.50 |
|           |        | $\beta_2= 1.42E+11$ | $\gamma_2= 0.22$ |       |      |
| 1500 rpm  | Step 1 | $\beta_1= 7.20E+09$ | $\gamma_1= 0.13$ | 0.994 |      |
|           | Step 2 | $\beta_1= 3.34E+11$ | $\gamma_1= 0.17$ | 0.986 | 4.00 |
|           |        | $\beta_2= 2.20E+11$ | $\gamma_2= 0.20$ |       |      |
| 1000 rpm  | Step 1 | $\beta_1= 8.64E+09$ | $\gamma_1= 0.12$ | 0.998 |      |
|           | Step 2 | $\beta_1= 4.81E+11$ | $\gamma_1= 0.16$ | 0.984 | 3.00 |
|           |        | $\beta_2= 4.42E+11$ | $\gamma_2= 0.19$ |       |      |
|           | Step 3 | $\beta_1= 9.37E+11$ | $\gamma_1= 0.25$ | 0.991 | 4.50 |
| 500 rpm   | Step 1 | $\beta_1= 9.98E+09$ | $\gamma_1= 0.11$ | 0.996 |      |
|           | Step 2 | $\beta_1= 6.05E+11$ | $\gamma_1= 0.15$ | 0.987 | 3.00 |
|           |        | $\beta_2= 4.65E+11$ | $\gamma_2= 0.17$ |       |      |
|           | Step 3 | $\beta_1= 3.00E+12$ | $\gamma_1= 0.22$ | 0.910 | 4.00 |
| UF (VRR6) |        |                     |                  |       |      |
| 2500 rpm  | Step 1 | $\beta_1= 7.28E+09$ | $\gamma_1= 0.07$ | 0.999 |      |
| 2000 rpm  | Step 1 | $\beta_1= 8.04E+09$ | $\gamma_1= 0.05$ | 0.999 |      |
|           | Step 2 | $\beta_1= 1.34E+11$ | $\gamma_1= 0.10$ | 0.997 | 4.00 |
|           |        | $\beta_2= 9.43E+11$ | $\gamma_2= 0.16$ |       |      |
| 1500 rpm  | Step 1 | $\beta_1= 8.68E+09$ | $\gamma_1= 0.05$ | 0.993 |      |
|           | Step 2 | $\beta_1= 1.93E+12$ | $\gamma_1= 0.09$ | 0.999 | 4.00 |
|           |        | $\beta_2= 5.59E+12$ | $\gamma_2= 0.15$ |       |      |
| 1000 rpm  | Step 1 | $\beta_1= 1.01E+10$ | $\gamma_1= 0.04$ | 0.997 |      |
|           | Step 2 | $\beta_1= 7.96E+12$ | $\gamma_1= 0.08$ | 0.995 | 3.00 |
|           |        | $\beta_2= 2.36E+12$ | $\gamma_2= 0.13$ |       |      |
|           | Step 3 | $\beta_1= 9.96E+12$ | $\gamma_1= 0.22$ | 0.994 | 4.50 |
| 500 rpm   | Step 1 | $\beta_1= 1.23E+10$ | $\gamma_1= 0.03$ | 0.994 |      |
|           | Step 2 | $\beta_1= 1.10E+11$ | $\gamma_1= 0.07$ | 0.998 | 3.00 |
|           |        | $\beta_2= 6.77E+12$ | $\gamma_2= 0.07$ |       |      |
|           | Step 3 | $\beta_1= 6.46E+12$ | $\gamma_1= 0.12$ | 0.990 | 4.00 |
|           |        | $\beta_2= 3.98E+13$ | $\gamma_2= 0.18$ |       |      |
